# Supplementary material
Source: PubMed Central journal article supplement (PMC3260782)
Supplement: mmc1.pdf [file mmc1.pdf]

# **Understanding the Cooperative Interaction between Myosin II and Actin Crosslinkers Mediated by Actin Filaments during Mechanosensation**

Tianzhi Luo, Krithika Mohan, Vasudha Srivastava, Yixin Ren, Pablo A. Iglesias, and Douglas N. Robinson

## **Supplemental Materials**

### **Supplemental Methods, Analysis, and Discussion**

#### **Pharmacological modulation of F-actin levels and the corresponding myosin mechanosensory responses**

We used latrunculin-A and jasplakinolide to adjust the F-actin level in *myoII* null cells expressing GFP-myosin II and determined the amount of F-actin by rhodamine-phalloidin staining. Cells were grown overnight in the presence of 0.2% DMSO on coverslips, and were then treated with 5  $\mu$ M latrunculin-A or 2  $\mu$ M jasplakinolide for 20 min. The cells were fixed with  $-20^{\circ}\text{C}$  acetone for 3 min. on ice and blocked in 1X PBT (1X PBS, 0.05% Triton X-100 and 0.5% BSA). Samples were stained with 160 nM rhodamine-phalloidin for 1 hour, then washed 4-5 times with 1X PBT and mounted in 90% glycerol 1X PBS. For quantification of the actin levels, images were acquired on an Olympus IX81 microscope under identical imaging conditions. The fluorescence signals were measured for each cell and used as an indicator of the relative F-actin amount. More than 300 cells were counted per condition and the signals were normalized to the average of the 0.2% DMSO control. The cells were also imaged using a Zeiss 510 Meta confocal microscope to study the effects on the actin and myosin II distributions.

Latrunculin treatment reduced the F-actin levels to 40% of control while jasplakinolide treatment increased F-actin levels four-fold (Fig. S2A,B). Both drug treatments induced aggregations of F-actin and myosin II in the cortex, which lead to the structural non-uniformity as compared to untreated cells. In the MPA assays, only very low pressures could be applied to latrunculin-A-treated cells due to their extremely high deformability (higher pressures aspirated the entire cell into the micropipette, making measurements at these pressures impossible). No mechanosensitive accumulation was observed at these low pressures. In contrast, jasplakinolide treatment did not alter the mechanoresponsiveness as compared to control over a range of aspiration pressures (Fig. S2C).

## The 2D kinetic Monte Carlo simulations reflect the 3D events

In the lattice kinetic Monte Carlo simulations, we used a 2D simulation box. However, the simulations reasonably mimic 3D events because the length of mesh size, the length that single myosin covers along actin filament, the binding and unbinding rates, and the diffusion coefficients are based on 3D structures and 3D measurements (1). As far as the diffusion in different dimensions is concerned, the mean square displacements of a random walk during time period  $\Delta t$  are  $\langle \Delta x \rangle^2 = 4D\Delta t$  and  $\langle \Delta x \rangle^2 = 6D\Delta t$  for 2D and 3D cases, respectively, and hence the mean square displacement differs only by a factor of 1.5 between the 2D and 3D cases. However, differences between these 2D and 3D scenarios could slightly alter the cluster size.

## The mean-field approximation of $E_s$ from statistical mechanics

We considered a one-dimensional actin filament with  $N$  binding sites for myosin and used periodic boundary conditions to mimic an infinitely long filament. The partition function  $Z$  of the system at each  $\phi$  was calculated from  $10^7$  random samplings according to  $Z = \sum_j g_j \exp(-H_j/k_B T)$ , where  $g_j$  is the corresponding degeneracy of the same energy level and  $H$  is the energy of the system defined as  $H = U - E_{binding}$ . Here,  $U$  is the free energy of the system in the absence of the binding of myosin to actin and  $E_{binding}$  is the binding energy of the system. Mathematically,  $U$  has the form of  $U = NE_{site} + N\phi E_{myo}$ , where  $N\phi$  gives the number of myosins in the system, and  $E_{site}$  and  $E_{myo}$  are the energies for the single binding site and myosin, respectively. The binding energy of the system is simply the sum of the binding energy of each myosin-actin complex that has been defined in the KMC scheme, *i.e.*,  $E_{binding} = \sum_i (E_i^0 + \Delta E_i)$  and  $\Delta E_i = \sum_k E_s^k(x_{ik})$  for  $1 \leq i \leq N\phi$ . The system energy  $H$  then depends on the coverage  $\phi$ . The probability of the system at energy level  $H_j$  is  $P_j(H_j) = \frac{1}{Z} g_j \exp(-H_j/k_B T)$  and the mean value of  $H$  is  $\langle H \rangle = \sum_j P_j H_j$ . It is noted that  $U$  and  $E_i^0$  are constants for each  $N\phi$  and do not depend on the permutation of the myosin positions. As a result, they cancel out eventually in the

exponential terms in both the numerator and the denominator of  $P_j$ . By expanding both sides of

$\langle H \rangle = \sum_j P_j H_j$ , one has

$$\left\langle U - \sum_i E_i^0 - \sum_i \Delta E_i \right\rangle = \frac{\sum_j g_j \left( U - \sum_i E_i^0 - \sum_i \Delta E_i \right)_j \exp\left(\left(\sum_i \Delta E_i\right)_j / k_B T\right)}{\sum_j g_j \exp\left(\left(\sum_i \Delta E_i\right)_j / k_B T\right)}. \quad (\text{S1})$$

Again, considering that  $U$  and  $E_i^0$  are constants, Eq. S1 reduces to

$$\left\langle \sum_i \Delta E_i \right\rangle = \frac{\sum_j g_j \left( \sum_i \Delta E_i \right)_j \exp\left(\left(\sum_i \Delta E_i\right)_j / k_B T\right)}{\sum_j g_j \exp\left(\left(\sum_i \Delta E_i\right)_j / k_B T\right)}. \quad (\text{S2})$$

$\left\langle \sum_i \Delta E_i \right\rangle$  is the average change in the binding energy of the system due to the cooperative interactions. Since  $\sum_i \Delta E_i = \sum_i E_s^i(x_{ik}) = \sum_i \sum_k E_s^0 \exp(-|x_{ik}|/\lambda)$ , the mean-field approximation of  $\sum_i \Delta E_i$ ,  $E_s$ , can be calculated exactly for each  $N\phi$  using Eq. S2 and the values of  $E_s^0$  and  $\lambda$ .

### The effect of the distribution of actin filament length on the cooperativity of myosin II

The mesh size of actin network is an average distance between the crosslinking points. In 2D lattice kinetic Monte Carlo simulations, the window size of simulation box is equal to the mesh size assumed. When the mesh size is much larger than the characteristic decay length of the strain field,  $\lambda$ , changing the mesh size only affects the effective actin concentration in the simulation box and does not qualitatively change the cooperativity between bound myosins. However, in cells, the actin filament length has a broad distribution, varying from a few nanometers to submicron or even microns. If the length of certain actin filaments is close to the decay length,  $\lambda$  ( $3a = 15$  nm), the cooperativity of myosins on these filaments will not be as strong as predicted (or simulated) by this paper. To compare the simulation results in this paper to the myosin behaviors in real cells, it is necessary to take the distribution of actin filament length into account. For WT *Dictyostelium* cells, the mean and the median of the actin filament length are 94 nm and 81 nm, respectively (2). Therefore, the effect of the randomness of actin

filament lengths is negligible when we compare the simulations to the experiments with *Dictyostelium* cells.

### The possibility of the force-dependency of the on-rate, $k_1$

Here, the “off” rates  $k_{-1}$  is considered to be the primary force dependent term for two reasons. The first is that the *in vitro* assay in Ref. (3) indicates the cooperativity of myosin II is dependent on the isometric, actin-bound state of myosin II. The second is that the myosin actin-binding lifetime is force-dependent (4). These two findings strongly suggest that the “off” rates (or the binding lifetimes of myosin to actin) are force-dependent. However, it is possible that the strain energy also affects the “on” rates by altering the actin filament structure, promoting myosin binding. Numerically, we can simulate the cooperativity associated with the changes of the "on" rates. However, with limited experimental evidence for changes in the "on" rate due to forces and strains, the biological relevance of such simulations is unclear.

### The dependence of $\Delta E'_b$ on $m$

According to Eq. 3 (main text),  $k_{-1}$  is an exponential function of  $\Delta E'_b$ , which is a function of the amount of bound myosin ( $m$ ) and is described by

$$\Delta E'_b = \delta m + Fd/\alpha m. \quad (\text{S3})$$

The first term represents the strain energy and the second term is associated with the applied force.  $\delta$  can have a value of either  $\delta_1$  or  $\delta_2$  depending on the amount of bound myosin  $m$  according to Eq. 3.  $\delta_1 > \delta_2$  is always true since  $\chi_1 > \chi_2$ .  $\Delta E'_b$  reaches its minimum when  $m$  is at its critical value  $m_{cr} = \sqrt{\alpha Fd/\delta}$ .  $\delta_{cr}$  may be defined as  $\delta_{cr} = Fd/\alpha m_{cr}^2$ . When  $\delta > \delta_{cr}$ ,  $\Delta E'_b$  increases with  $m$  and otherwise decreases with  $m$ . As a result,  $k_{-1}$  decreases with  $m$  if  $\delta > \delta_{cr}$  and increases with  $m$  if  $\delta < \delta_{cr}$ . We then considered the case where  $\delta_1 > \delta_{cr} > \delta_2$ . Two curves (dotted lines) describing  $\Delta E'_b$  as a function of  $\phi$  are shown in Fig. S6A with  $\delta = \delta_1$  and  $\delta = \delta_2$ , respectively. It is easier to discuss the dependence of  $\Delta E'_b$  on  $m$  instead of  $\phi$  as  $m$  is related to  $\phi$  by  $\phi = 3m/C_{actin}$ . During myosin assembly,  $E_s$  initially has a slope of  $\delta_1$  at  $\phi$  and the slope changes to  $\delta_2$  as the number of bound myosin  $\phi$  exceeds  $\phi^*$ . The corresponding transient

behavior of  $\Delta E'_b$  is schematically indicated by the solid curve in Fig. 3A.  $\Delta E'_b$  as a function of  $\phi$  at different  $Fd/\alpha$  for  $E_s^0$  at 1, 2, and  $3k_B T$  are shown in Figs S6B-D, respectively.

### **The concentration of unbound myosin monomer during myosin transport**

In cells, the local myosin concentration changes but the concentration of certain myosin forms might be constant. The mobile or diffusible unit of myosin in cell cortex is more likely to be the unbound myosin monomer (UMM). The cytoplasm can be considered as a reservoir of UMM and diffusion is able to quickly smooth the UMM gradient in the cytoplasm, which means the concentration of UMM is constant during the BTF assembly induced by local force. Therefore, to simulate the myosin accumulation and BTF assembly during mechanosensing without using real 3D geometry (results shown in Fig. 5), the concentration of UMM ( $M$  and  $\overline{M}$ ) is kept constant.

### **The sensitivity of $k_-$ and $k_+$ in the absence of force**

The coefficient  $k_-$  may be evaluated numerically by fitting the simulation results to the observation that the BTF fraction is ~20%-50%. Here,  $k_-$  varied in the range 0.004-0.1  $s^{-1}$  assuming  $C_{myosin} = 3.4 \mu M$ ,  $C_{actin} = 20.0 \mu M$ ,  $E_s^0 = 1.0 k_B T$ , and  $Fd = 0$  (Fig. S7A). It can be seen that high  $k_-$  leads to less assembled BTF. At  $k_- = 0.1 s^{-1}$ , the BTF concentration is maintained at 0.7  $\mu M$ , ~20% of the total myosin. For the case of  $E_s^0 > 1.0 k_B T$ , larger  $k_-$  is needed to set steady-state BTF at 0.7  $\mu M$  (not shown).

As a proof of principle,  $k_+$  is varied by adjusting  $C_{actin}$  in the range of 5-20  $\mu M$ , assuming that  $C_{myosin} = 3.4 \mu M$ ,  $k_- = 0.1 s^{-1}$ ,  $E_s^0 = 1.0 k_B T$ , and  $Fd = 0$  (Fig. S7B). It can be seen that the high F-actin does promote BTF assembly and the saturation concentration of actin is about six times the myosin concentration, which is consistent with the experimental observations (5). For different  $E_s^0$ , it is true that higher  $k_+$  leads to more bound myosin, which can be seen by comparing Fig. S8A to S8B. In these simulations, the force term is zero and the myosin concentration is constant. Hence, the simulations reflect the conditions of *in vitro* BTF assembly.

### **Estimation of the $Fd$ term for *Dictyostelium* cells during MPA measurements**

During MPA measurements, the applied pressure is transmitted through the membrane and the membrane-cortex linkage to the actin cortex. Initially, myosin II concentration in the cortex,  $C_{myosin}$ , is 4  $\mu\text{M}$  of which approximately half is in BTFs (6). Assuming the thickness of the cortex is  $\sim 0.5 \mu\text{m}$ ,  $\sim 2000$  myosins per  $\mu\text{m}^2$  counteract the pressure applied externally on the plasma membrane. Each myosin has two heads and a 4.0 pN stall force. As a result, the upper bound of duty ratio, 0.06, gives a maximum stress of  $\sim 0.5 \text{ nN}/\mu\text{m}^2$  if all engaged myosins are stalled due to the applied force. This leads to a corresponding maximum value of  $Fd$  of  $\sim 280 \text{ k}_B\text{T}$  where  $Fd$  is based on the total force/area ( $\text{nN}/\mu\text{m}^2$ ).

### **The relation between $Fd$ term and the applied pressure during MPA measurements**

Besides myosin II, a number of other load bearing units exist in the actin cytoskeleton, including actin crosslinking proteins whose concentrations are also on the order of 1  $\mu\text{M}$ . Because these proteins bear some of the load, only a fraction of the applied pressure is distributed on myosin. Based on measurements of the cortical tension in interphase wild type and *myoII* null cells (2), we estimate that myosin II contributes  $\sim 20\%$  of the cortical tension. Thus, it is reasonable to assume that myosin II only bears  $\sim 20\%$  of the pressure applied on interphase wild type *Dictyostelium* cells during MPA measurements. Further support for this idea comes from the observation that reducing interphase cortical tension by 3-fold in *racE* mutants reduces the mechanosensitive pressure-range of interphase cells by 3-5-fold (RacE controls the distribution of cortical actin crosslinking proteins) (7). Therefore, the range of  $0\sim 280 \text{ k}_B\text{T}$  of  $Fd$  for myosin II roughly corresponds to  $0\sim 2.5 \text{ nN}/\mu\text{m}^2$  (*i.e.*, the maximum is five times  $\sim 0.5 \text{ nN}/\mu\text{m}^2$ ) of the applied pressure on the intact wild type cytoskeleton when the cortical myosin II concentration is 4  $\mu\text{M}$ .

### **Solving the reaction-diffusion equations of myosin BTF assembly and myosin accumulation in 3D geometry by COMSOL**

The multi-scale model describing the BTF assembly formation and myosin accumulation was implemented using COMSOL Multi-physics (COMSOL, Burlington, MA) version 4.2. The model was configured using a geometry drawn in “2D and 2D” axially symmetric space, to take advantage of symmetry. Subsequent results were displayed in full three dimensions. Each simulation was meshed using a physics controlled “Normal mesh.” The reaction-diffusion

equations describing the model were solved using the Coefficient Form Partial Differential Equation (PDE) Interface found under the Mathematics branch of Physics Interfaces, along with a zero flux boundary condition. The system of PDEs were first solved at steady state using the Multifrontal Massively Parallel Sparse (MUMPS) direct solver and the resultant solution set was used as the initial condition for subsequent simulations. For simulating transient behavior the MUMPS direct solver along with a Backward Differentiation Formula (BDF) time stepping method was used. The time step for every computation was allowed to be chosen by the solver through the “Free” time-stepping option, but the maximum time-step chosen by the solver was fixed to 0.1s. The total simulation time was set to 200 s. For all the numerical simulations, COMSOL Multi-physics accepts volume concentrations ( $\mu\text{M}$ ) in SI derived units, so all concentrations were converted to  $\text{mol}/\text{m}^3$  by multiplying (or dividing) by  $10^{-3}$ . For simplicity, the maximum size of BTF in the simulations is  $n=5$  although it was found experimentally that  $n$  could be as large as 36. The cell diameter was  $10 \mu\text{m}$ . The diameter of the pipette was  $5 \mu\text{m}$  and the length of the cylindrical part was  $2.5 \mu\text{m}$  (Fig. S10). A diffusion coefficient  $0.2 \mu\text{m}^2/\text{s}$  (1), was chosen for all myosin forms except for  $\text{BTF}_4$  and  $\text{BTF}_5$  for which the diffusion coefficient was set to zero. The thickness of the actin cortex is  $500 \text{ nm}$ . The change of  $k_{-1}$  due to applied force was only applied to the actin cortex in the tip region.

The reaction-diffusion equations in the simulations are

$$\begin{aligned}
\frac{\partial C_M}{\partial t} &= D \frac{\partial^2 C_M}{\partial \bar{x}^2} + (k_{-1} C_{M^*} - k_1 C_M) + (k_+ C_{\bar{M}} - k_- C_M) \\
\frac{\partial C_{\bar{M}}}{\partial t} &= D \frac{\partial^2 C_{\bar{M}}}{\partial \bar{x}^2} + (k_1 C_{M^*} - k_{-1} C_{\bar{M}}) - (k_+ C_{\bar{M}} - k_- C_M) \\
\frac{\partial C_{\bar{M}^*}}{\partial t} &= D \frac{\partial^2 C_{\bar{M}^*}}{\partial \bar{x}^2} + (k_{-1} C_{\bar{M}^*} - k_1 C_{\bar{M}}) - (k_+ C_{\bar{M}^*} - k_- C_{M^*}) \\
\frac{\partial C_{M^*}}{\partial t} &= D \frac{\partial^2 C_{M^*}}{\partial \bar{x}^2} + (k_1 C_M - k_{-1} C_{M^*}) + (k_+ C_{\bar{M}^*} - k_- C_{M^*}) - 2(k_2 C_{M^*}^2 - k_{-2} C_D) \\
\frac{\partial C_D}{\partial t} &= D \frac{\partial^2 C_D}{\partial \bar{x}^2} + (k_2 C_{M^*}^2 - k_{-2} C_D) - 2(k_3 C_D^2 - k_{-3} C_T) - (k_4 C_D C_T - k_{-4} C_{\text{BTF}_3}) \\
&\quad - (k_5 C_D C_{\text{BTF}_3} - k_{-5} C_{\text{BTF}_4}) - (k_5 C_D C_{\text{BTF}_4} - k_{-5} C_{\text{BTF}_5}) \\
\frac{\partial C_T}{\partial t} &= D \frac{\partial^2 C_T}{\partial \bar{x}^2} + (k_3 C_D^2 - k_{-3} C_T) - (k_4 C_D C_T - k_{-4} C_{\text{BTF}_3}) \\
\frac{\partial C_{\text{BTF}_4}}{\partial t} &= D \frac{\partial^2 C_{\text{BTF}_4}}{\partial \bar{x}^2} + (k_5 C_D C_{\text{BTF}_3} - k_{-5} C_{\text{BTF}_4}) - (k_5 C_D C_{\text{BTF}_4} - k_{-5} C_{\text{BTF}_5}) \\
\frac{\partial C_{\text{BTF}_5}}{\partial t} &= D \frac{\partial^2 C_{\text{BTF}_5}}{\partial \bar{x}^2} + (k_5 C_D C_{\text{BTF}_4} - k_{-5} C_{\text{BTF}_5})
\end{aligned} \tag{S4}$$

where  $C$  represents the concentration and the subscripts correspond to different components in the assembly scheme. Parameters and algorithm are listed in Tables S1 to S3.



## Supplemental References

1. Uehara, R., G. Goshima, I. Mabuchi, R. D. Vale, J. A. Spudich, and E. R. Griffiths. 2010. Determinants of myosin II cortical localization during cytokinesis. *Curr. Biol.* 20:1080-1085.
2. Reichl, E. M., Y. Ren, M. K. Morpew, M. Delannoy, J. C. Effler, K. D. Girard, S. Divi, P. A. Iglesias, S. C. Kuo, and D. N. Robinson. 2008. Interactions between myosin and actin crosslinkers control cytokinesis contractility dynamics and mechanics. *Curr. Biol.* 18:471 - 480.
3. Tokuraku, K., R. Kurogi, R. Toya, and T. Q. Uyeda. 2009. Novel mode of cooperative binding between myosin and Mg<sup>2+</sup>-actin filaments in the presence of low concentrations of ATP. *J. Mol. Biol.* 386:149-162.
4. Veigel, C., J. E. Molloy, S. Schmitz, and J. Kendrick-Jones. 2003. Load-dependent kinetics of force production by smooth muscle myosin measured with optical tweezers. *Nat. Cell Biol.* 5:980-986.
5. Mahajan, R. K., K. T. Vaughan, J. A. Johns, and J. D. Pardee. 1989. Actin filaments mediate *Dictyostelium* myosin assembly in vitro. *Proc. Natl. Acad. Sci. U.S.A.* 86:6161-6165.
6. Surcel, A., Y.-S. Kee, T. Luo, and D. N. Robinson. 2010. Cytokinesis through biochemical-mechanical feedback loops. *Semin. Cell Dev. Biol.* 21:866-873.
7. Ren, Y., J. C. Effler, M. Norstrom, T. Luo, R. A. Firtel, P. A. Iglesias, R. S. Rock, and D. N. Robinson. 2009. Mechanosensing through cooperative interactions between myosin II and the actin crosslinker cortexillin I. *Curr. Biol.* 19:1421-1428.
8. Berlot, C. H., P. N. Devreotes, and J. A. Spudich. 1987. Chemoattractant-elicited increases in *Dictyostelium* myosin phosphorylation are due to changes in myosin localization and increases in kinase activity. *J. Biol. Chem.* 262:3918-3926.
9. Mahajan, R. K., and J. D. Pardee. 1996. Assembly mechanism of *Dictyostelium* myosin II: Regulation by K<sup>+</sup>, Mg<sup>2+</sup>, and actin filaments. *Biochemistry* 35:15504-15514.
10. Moores, S. L., and J. A. Spudich. 1998. Conditional loss-of-myosin-II-munction mutants reveal a position in the tail that is critical for filament nucleation. *Mol. Cell* 1:1043-1050.
11. Yumura, S., M. Yoshida, V. Betapudi, L. S. Licate, Y. Iwadate, A. Nagasaki, T. Q. Uyeda, and T. T. Egelhoff. 2005. Multiple myosin II heavy chain kinases: roles in filament assembly control and proper cytokinesis in *Dictyostelium*. *Mol. Biol. Cell* 16:4256-4266.
12. Takács, B., E. O'Neill-Hennessey, C. Hetényi, J. Kardos, A. G. Szent-Györgyi, and M. Kovács. 2011. Myosin cleft closure determines the energetics of the actomyosin interaction. *FASEB J.* 25:111-121.
13. Zhou, Q., Y.-S. Kee, C. C. Poirier, C. Jelinek, J. Osborne, S. Divi, A. Surcel, M. E. Will, U. S. Eggert, A. Müller-Taubenberger, P. A. Iglesias, R. J. Cotter, and D. N. Robinson. 2010. 14-3-3 coordinates microtubules, rac, and myosin II to control cell mechanics and cytokinesis. *Curr. Biol.* 20:1881-1889.

Table S1. Constants.

| Parameter                  | Value                                                                   | Conversion to SI derived units              | Description                                                                                                                                 | Reference    |
|----------------------------|-------------------------------------------------------------------------|---------------------------------------------|---------------------------------------------------------------------------------------------------------------------------------------------|--------------|
| $D$                        | $0.2 \mu\text{m}^2/\text{s}$                                            | $2 \times 10^{-13} \text{m}^2/\text{s}$     | Diffusion coefficient                                                                                                                       | (1)          |
| $k_+$                      | $0.05 \text{s}^{-1}$                                                    | $0.05 \text{s}^{-1}$                        | Scheme, Fig. 1                                                                                                                              | (8)          |
| $k_{-1}^0$                 | $300 \text{s}^{-1}$                                                     | $300 \text{s}^{-1}$                         | Scheme, Fig. 1: Rate controlling conversion from bound and unbound states of myosin monomers in the absence of force and homo-cooperativity | (9)          |
| $k_2$                      | $0.37 \mu\text{M}^{-1}\text{s}^{-1}$                                    | $370 \text{m}^3/\text{mol}\cdot\text{s}$    | Scheme, Fig. 1                                                                                                                              | (10)         |
| $k_{.2}$                   | $0.01 \text{s}^{-1}$                                                    | $0.01 \text{s}^{-1}$                        | Scheme, Fig. 1                                                                                                                              | Our estimate |
| $k_3$                      | $0.0395 \mu\text{M}^{-1}\text{s}^{-1}$                                  | $39.5 \text{m}^3/\text{mol}\cdot\text{s}$   | Scheme, Fig. 1                                                                                                                              | (10)         |
| $k_{.3}$                   | $0.045 \text{s}^{-1}$                                                   | $0.045 \text{s}^{-1}$                       | Scheme, Fig. 1                                                                                                                              | (9)          |
| $k_4$                      | $1.25 \mu\text{M}^{-1}\text{s}^{-1}$                                    | $1250 \text{m}^3/\text{mol}\cdot\text{s}$   | Scheme, Fig. 1                                                                                                                              | (9)          |
| $k_{.4}$                   | $0.025 \text{s}^{-1}$                                                   | $0.025 \text{s}^{-1}$                       | Scheme, Fig. 1                                                                                                                              | (9)          |
| $k_5$                      | $10 \mu\text{M}^{-1}\text{s}^{-1}$                                      | $10,000 \text{m}^3/\text{mol}\cdot\text{s}$ | Scheme, Fig. 1                                                                                                                              | Our estimate |
| $k_{.5}$                   | $0.2 \text{s}^{-1}$ (for WT)<br>or<br>$0.005 \text{s}^{-1}$ (for 3xAla) | $0.2 \text{s}^{-1} / 0.005 \text{s}^{-1}$   | Scheme, Fig. 1                                                                                                                              | (2, 11, 13)  |
| $k_{\text{on}}$            | $0.45 \mu\text{M}^{-1}\text{s}^{-1}$                                    | $450 \text{m}^3/\text{mol}\cdot\text{s}$    | On rate for myosin binding to actin                                                                                                         | (12)         |
| $C_{\text{actin}}$         | $72 \mu\text{M}$                                                        | $72 \times 10^{-3} \text{mol}/\text{m}^3$   | Actin concentration in the cytosol                                                                                                          | (6)          |
| $C_{\text{actin\_cortex}}$ | $79 \mu\text{M}$                                                        | $79 \times 10^{-3} \text{mol}/\text{m}^3$   | Actin concentration in the cortex                                                                                                           | (6)          |
| $C_{\text{myo total}}$     | $3.4 \mu\text{M}$                                                       | $3.4 \times 10^{-3} \text{mol}/\text{m}^3$  | Total cellular myosin II concentration                                                                                                      | (6)          |
| $\alpha$                   | $36 \mu\text{M}^{-1}$                                                   | $36 \times 10^{-6} \text{M}^{-1}$           | The product of the duty ratio, a geometric factor and the Avogadro's number                                                                 | (6)          |

Table S2. Variables.

| Parameter | Method of evaluation                                                                                                                                      | Description                                                                                  |
|-----------|-----------------------------------------------------------------------------------------------------------------------------------------------------------|----------------------------------------------------------------------------------------------|
| $k_-$     | Evaluated numerically by fitting simulation results to the observation that $C_{\text{myoBTF}} = \sim 20\text{-}50\%$ of $C_{\text{myoTotal}}$ (ref.(13)) | Scheme, Fig. 1: Myosin tail phosphorylation rate                                             |
| $k_1$     | $k_{on} C_{\text{actin}}$                                                                                                                                 | Scheme, Fig. 1: Rate controlling conversion from bound and unbound states of myosin monomers |
| $k_{-1}$  | $k_{-1}^0 \exp(-\Delta E'_b(x, y, t) / k_B T)$                                                                                                            | Scheme, Fig. 1: Rate controlling conversion from bound and unbound states of myosin monomers |

Table S3. Algorithm for calculating  $k_{-1}$ .

$$k_{-1}(x, y, t) = k_{-1}^0 \exp(-\Delta E_b'(x, y, t) / k_B T)$$

$$\Delta E_b'(x, y, t) = E_s + \frac{Fd(\theta)}{cm(x, y, t)}$$

$$E_s = \begin{cases} \chi_1 \varphi \\ \chi_1 \varphi^* + \chi_2 (\varphi - \varphi^*) \end{cases}$$

where  $\chi_1$ ,  $\chi_2$ , and  $\varphi^*$  are derived from Fig. S5C.

$$\varphi = \frac{3m(x, y, t)}{C_{\text{actin}}}$$

$$Fd(\theta) = Fd_0 \cos(\theta)$$

where  $\cos(\theta) = \cos(\arctan(y, x))$ , and  $Fd_0$  is the energy associated with the maximum applied stress at the cortex by micropipette aspiration.

$$m(x, y, t) = M^* + \bar{M}^* + 2D^* + 4T^* + \sum BTF_n^*$$

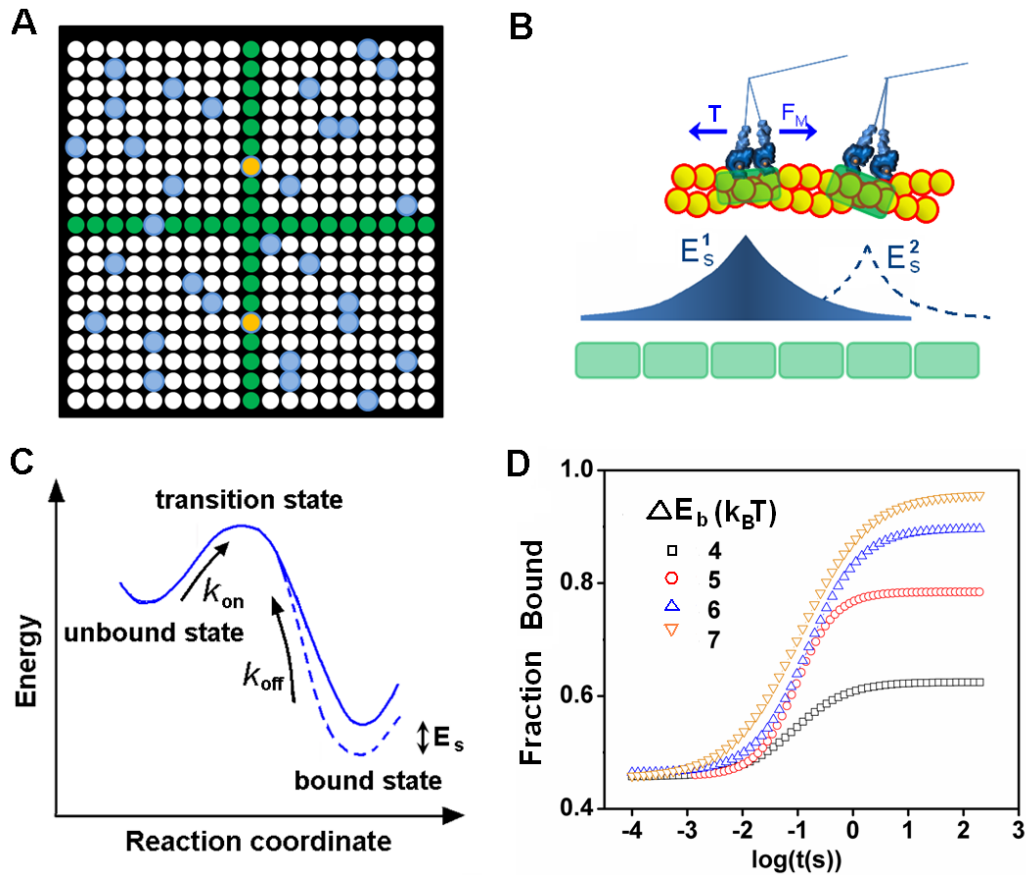

**Figure S1. Kinetic Monte Carlo model for cooperative myosin binding to actin filaments.** (A) A schematic graph of the 2D lattice for the KMC simulation is shown. White dots are empty lattices. Green dots are available binding sites. Yellow dots and blue dots represent bound and unbound myosins. (B) The exponentially decaying strain field associated with binding. The binding sites are indicated by green blocks. (C) The energy landscape of myosin binding to actin.  $E_s$  is the change of binding energy due to strain. (D) The kinetic binding curves of myosins for different changes of binding energy due to cooperative binding are shown.

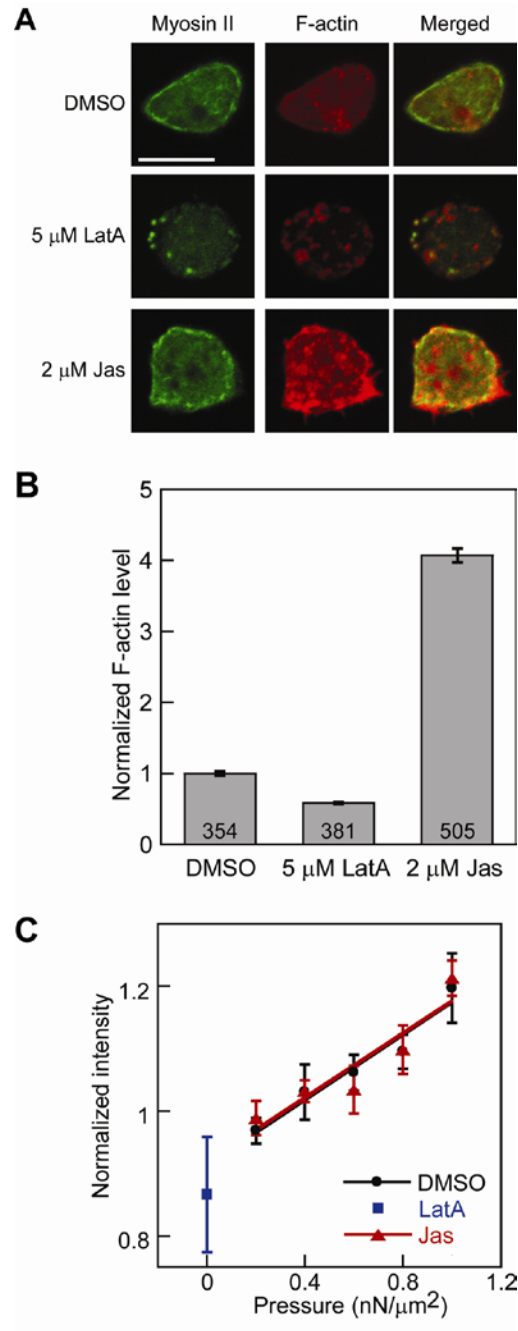

**Figure S2. Adjustment of the myosin II cortical localization and its mechanosensory response using actin inhibitors.** (A) Confocal images of GFP-myosin II and rhodamine-phalloidin stained F-actin in fixed cells treated by 5  $\mu$ M latrunculin and 2  $\mu$ M jasplakinolide. Scale bar represents 10  $\mu$ m. (B) The quantified F-actin levels for different drug treatments (the number of cells measured per condition is listed on the histogram). (C) The mechanosensory response of myosin with different drug treatments at different pressures. At each pressure, the data point (mean $\pm$ SEM) represents measurements from 15-20 cells.

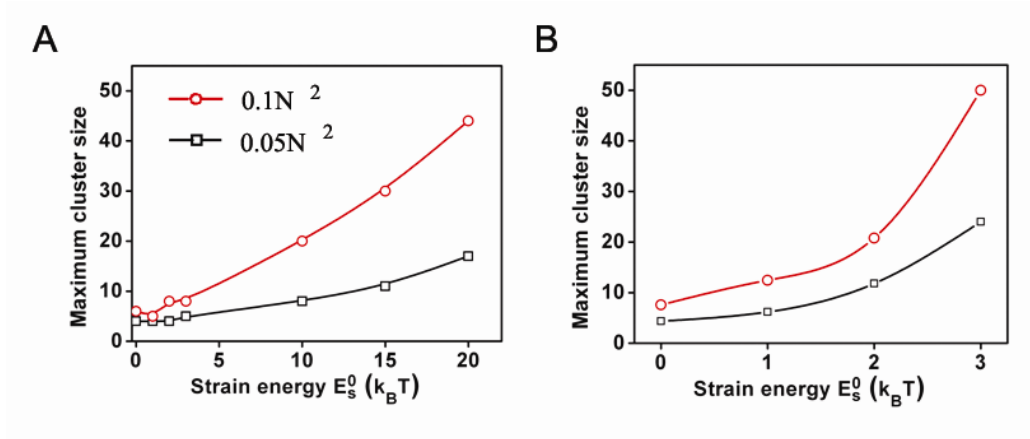

**Figure S3. The nearest-neighbor interaction underestimates the effect of cooperativity on myosin binding to F-actin.** The maximum cluster size of bound myosin in 2D lattice KMC simulations with nearest-neighbor interaction (*i.e.*,  $|x_{ij}| = a$ ), and long-range interactions (for example,  $|x_{ij}| \leq 3a$ ) are shown in (A) and (B), respectively. The myosin concentration is expressed in units of the simulation window size,  $N$ . Here,  $N=128$ , and the legend insert applies to both panels.

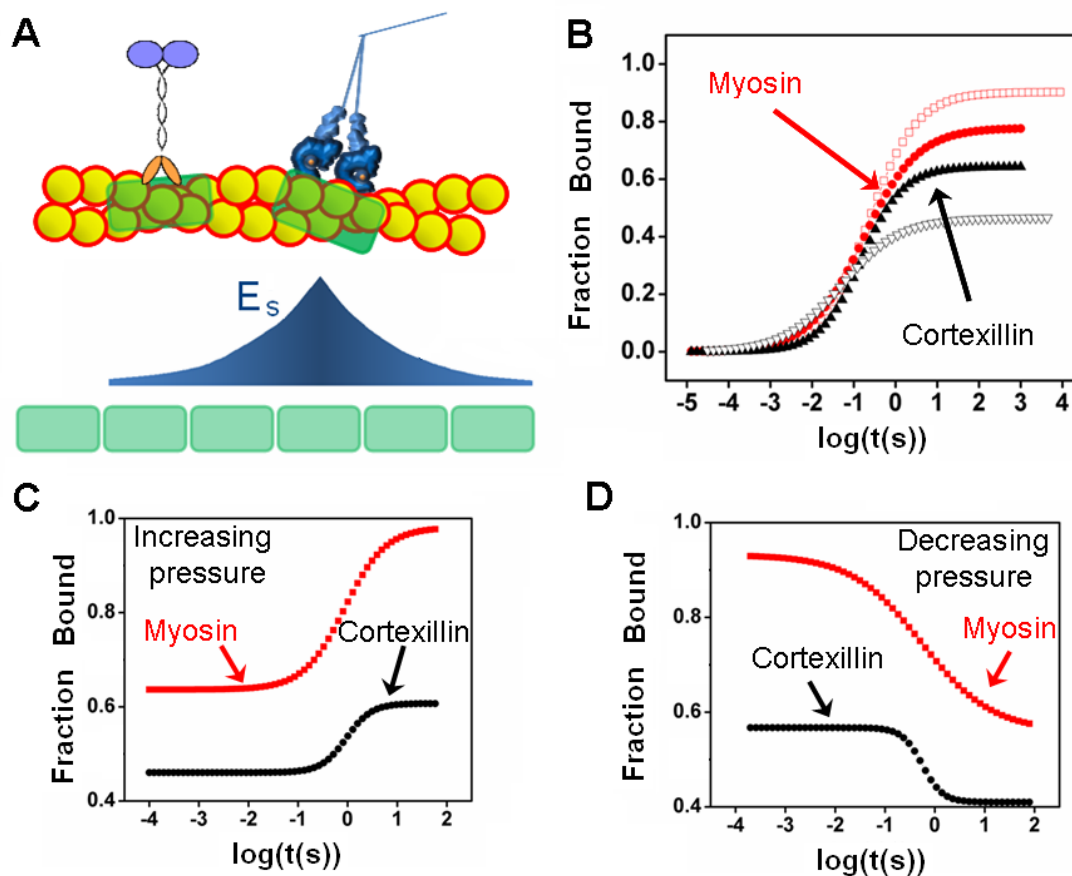

**Figure S4. Kinetic Monte Carlo simulation of hetero-cooperative actin binding by myosin II and cortexillin I.** (A) The strain field in the hetero-cooperative binding regime is shown. (B) Graph shows the binding curves of myosin alone (open red dots), cortexillin alone (open black triangles) and the mixture of myosin and cortexillin (the filled dots and filled triangles). (C) and (D) show the binding behaviors of the protein mixture in response to pressure jumps.



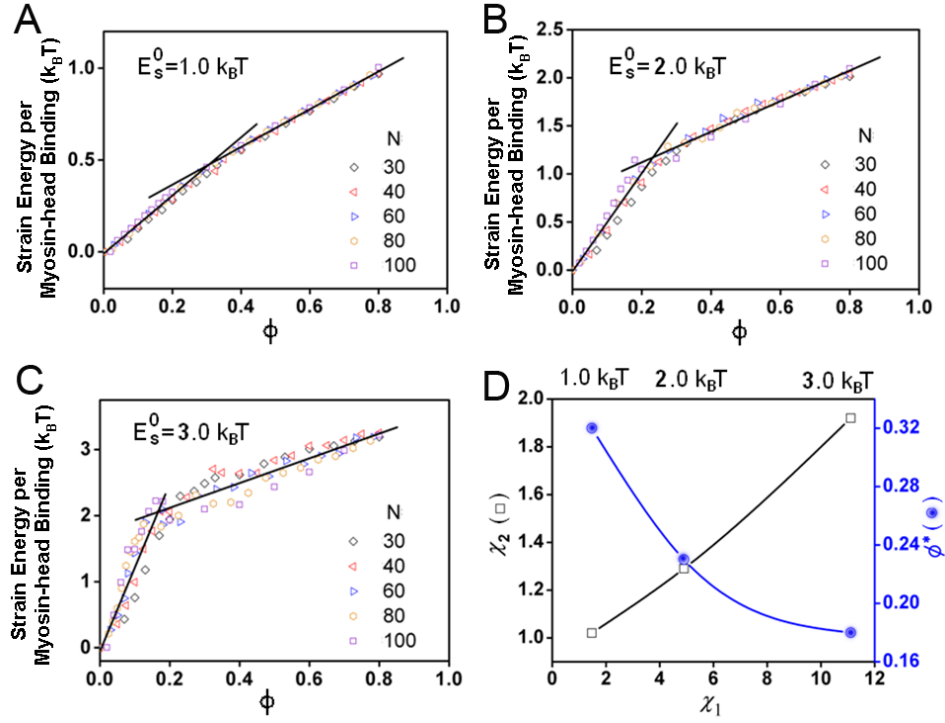

**Figure S5. The mean-field approximation of strain energy per myosin-head binding.** The change of binding energy is calculated from statistical mechanics for strain energy  $E_s^0$  at  $1 k_B T$  (A),  $2 k_B T$  (B) and  $3 k_B T$  (C) with different numbers of binding sites,  $N$ . Here,  $\phi$  is the coverage of the actin filaments by the bound myosins. (D) The values of  $\chi_1$ ,  $\chi_2$  and  $\phi^*$  at different strain energies ( $E_s^0 = 1, 2, 3 k_B T$  increasing from left to right).

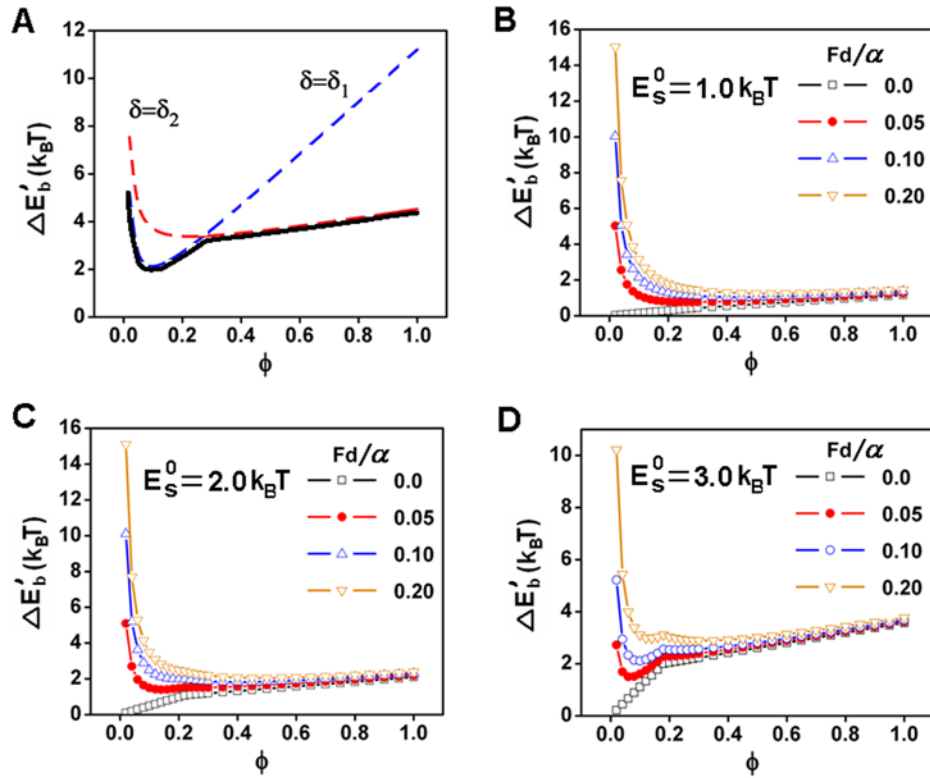

**Figure S6. The dependence of  $\Delta E'_b$  on  $m$ , the amount of bound myosin II.** (A) A schematic plot shows how  $\Delta E'_b$  (black solid line) changes its slope from  $\delta_1$  (blue dotted line) to  $\delta_2$  (red dotted line). The  $\Delta E'_b$  changes as a function of  $m$  for different  $Fd/\alpha$  when  $E_s^0$  has a value of  $1.0 k_B T$  (B),  $2.0 k_B T$  (C) and  $3.0 k_B T$  (D).

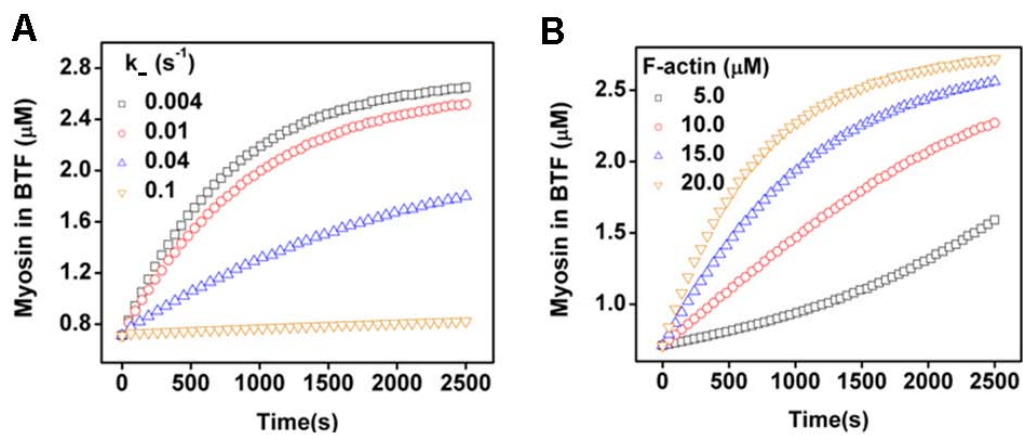

**Figure S7. The kinetics of *in vitro* BTF assembly.** (A) The assembly kinetics are shown for a fixed actin concentration but with different  $k_-$ . (B) The assembly kinetics are shown for different F-actin concentrations for  $E_s^0$  at  $1.0 k_B T$ .

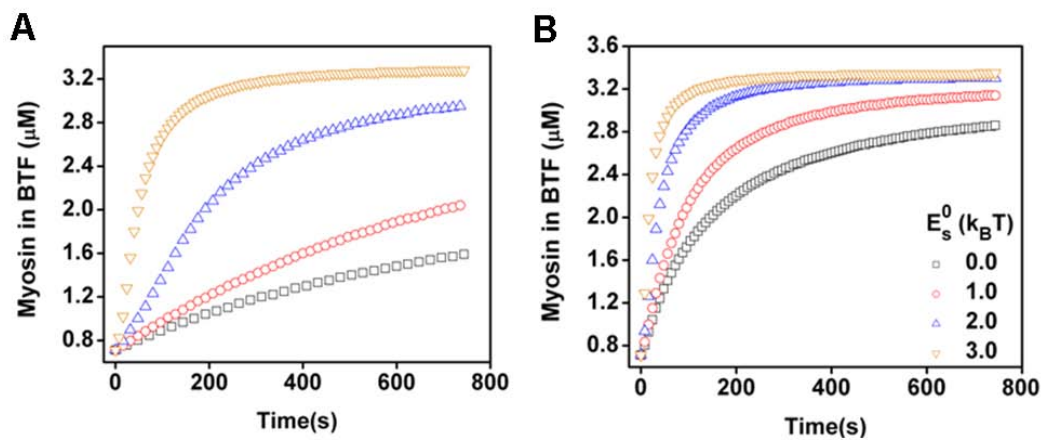

**Figure S8.** The myosin BTF assembly for  $k_+$  at  $6.6 \text{ s}^{-1}$  (A) and  $66.0 \text{ s}^{-1}$  (B), respectively. For all cases  $C_{\text{myosin}} = 3.4 \text{ } \mu\text{M}$ ,  $C_{\text{actin}} = 20.0 \text{ } \mu\text{M}$ , and  $Fd = 0 \text{ } k_B T$ .

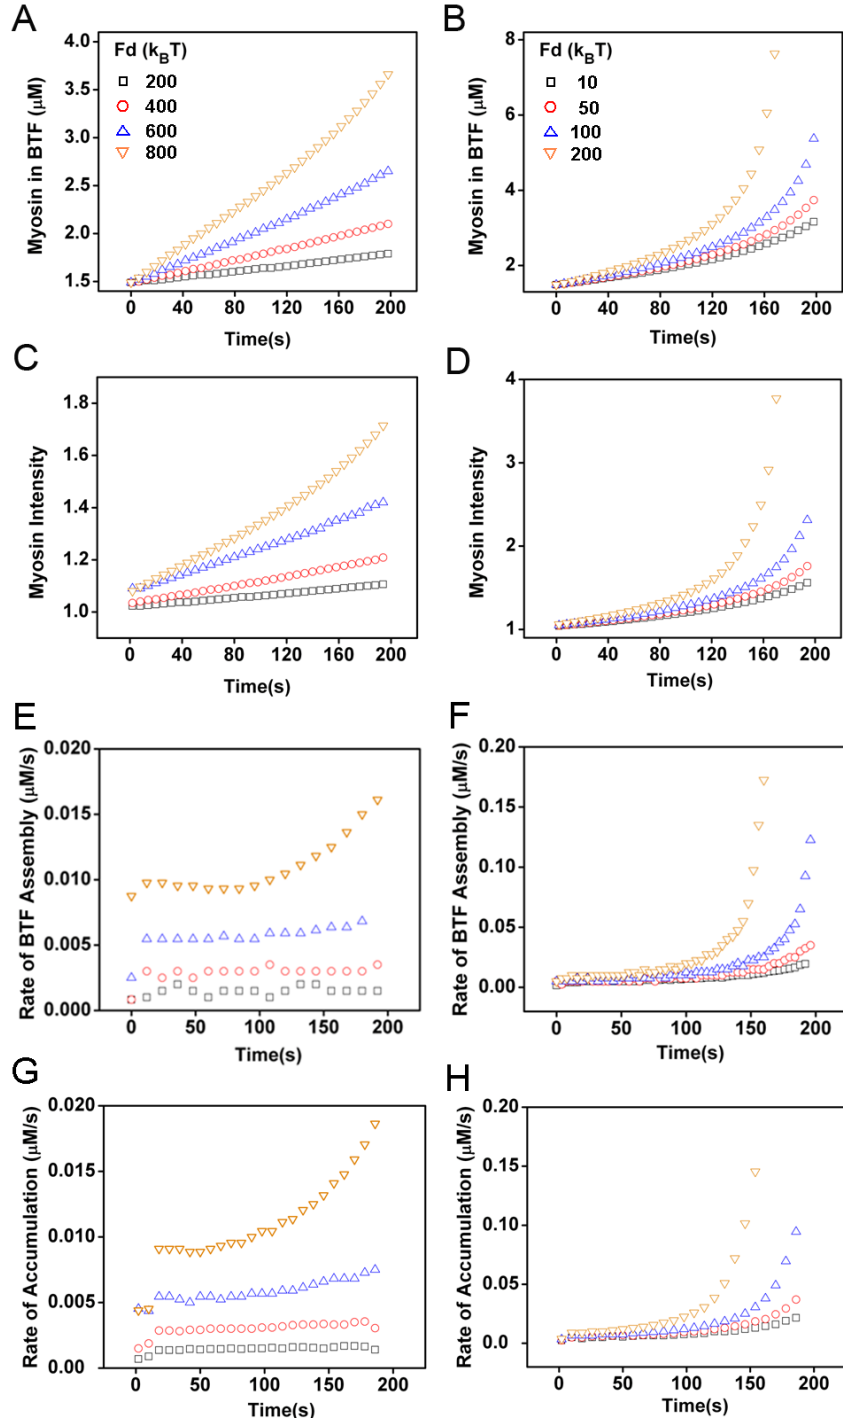

**Figure S9.** The BTF assembly, the associated myosin intensity and the corresponding rates are calculated at different  $Fd$  values but with same cooperativity,  $E_s^0 = 3 k_B T$ . Left column is for  $k_1: 7 \text{ s}^{-1}$  whereas right column is for  $k_1: 14 \text{ s}^{-1}$ .

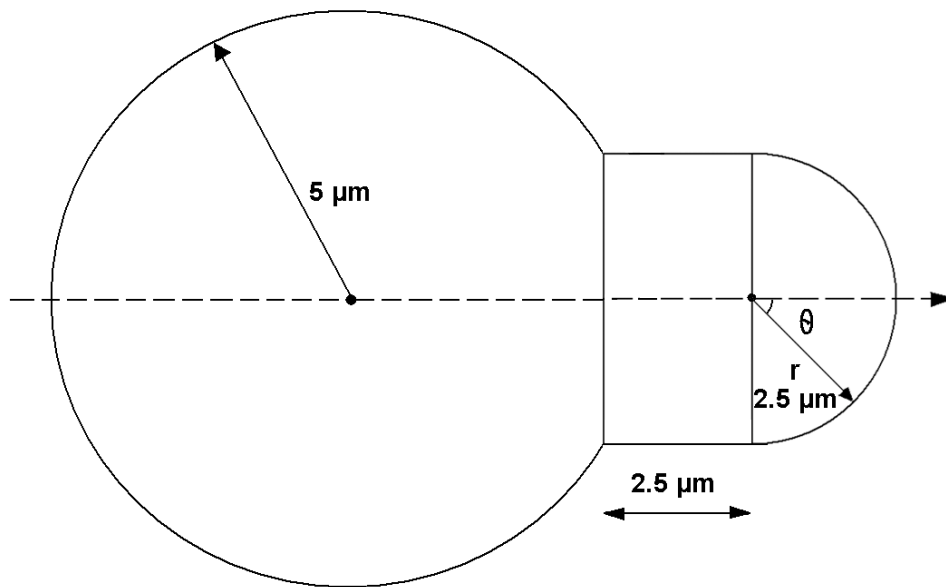

**Figure S10. The geometry of the cross-section of the cell region aspirated into the micropipette used for 3D simulations in COMSOL.**

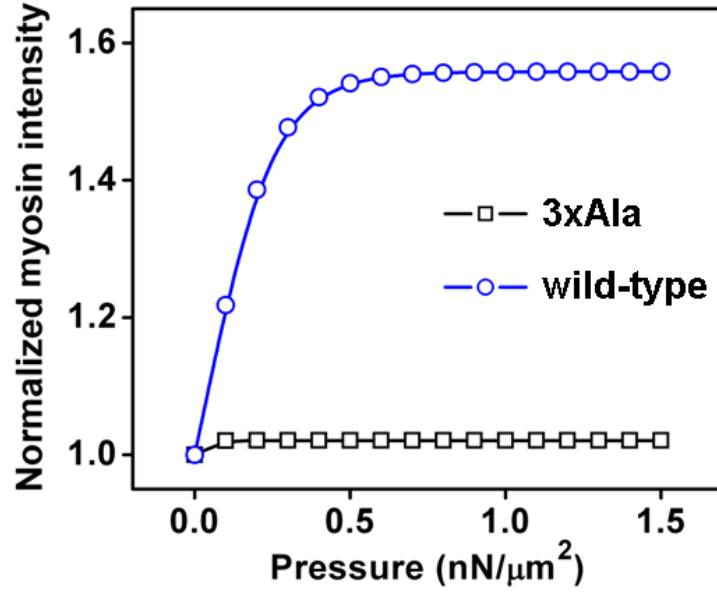

**Figure S11.** The normalized myosin intensity increased with the applied pressure,  $\Delta P$ . Here, the force-dependent term in Eq. 3,  $Fd/cam$ , is rewritten as  $\Delta P \Delta A d / (2 \rho \Delta A h N_A m)$ , where area  $\Delta A = 1 \mu\text{m}^2$ , duty ratio  $\rho = 0.06$ , thickness of cell cortex  $h = 0.5 \mu\text{m}$  and  $N_A$  is the Avogadro's number.

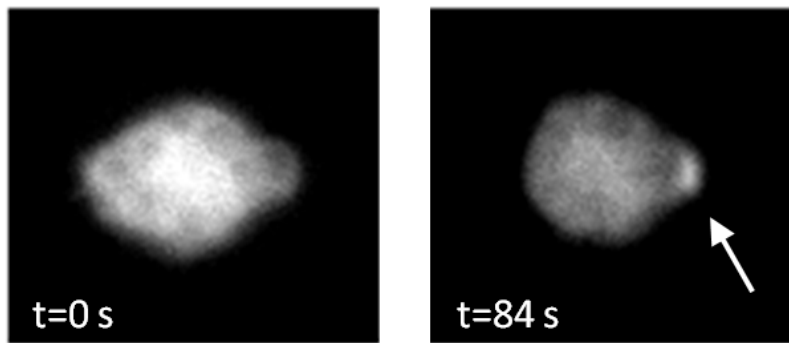

**Figure S12. The accumulation of myosin heavy chain kinase C in response to pressure at different time frames.**



## Supplemental Movie Legends

**Supplemental Movie 1.** Movie shows the simulation result for cooperative binding of myosin II to actin filaments. The bound myosins (orange dots) form clusters on the actin filaments. The grey dots are the freely diffusing monomers. The time delays between each frame increase logarithmically.

**Supplemental Movie 2.** Movie shows the simulation result for cooperative binding of myosin II and cortexillin I. Clusters containing both myosin II and cortexillin I are formed due to hetero-cooperativity. The bound myosins and cortexillins are represented by yellow and red dots, respectively. The unbound myosins and cortexillins are represented by grey and green dots, respectively. The time delays between each frame increase logarithmically.

**Supplemental Movie 3.** Movie shows the accumulation of WT myosin II in response to applied force.

**Supplemental Movie 4.** Movie shows the accumulation of 3xAla myosin II in response to applied force.

**Supplemental Movie 5.** Movie shows a 3D view of WT myosin II accumulation in response to applied stress. The movie has an 85° cutout so that the cell interior is visible.
